# Supplementary material for: Efficient and robust image registration for two-dimensional micro-X-ray fluorescence measurements
Source: Royal Society of Chemistry journal article supplement (doi:10.1039/d2ja00347c), 2023-01-01
Supplement: d2ja00347c1.pdf [file d2ja00347c1.pdf]

## Supplementary Information

### Efficient and robust image registration for two-dimensional micro-X-ray fluorescence measurements

Felix Bock, Andreas Gruber, Kerstin Leopold, and Henning Bruhn

#### A Error estimation for graph registration

We show here that, for GRAPH REGISTRATION with a Moore graph,  $\text{Var}[\hat{s}_j]$  tends to 0 as the parameter  $d$  of the Moore graph tends to infinity. We assume here a bit more familiarity with graph theory concepts than in the rest of the article. All concepts can be found in a standard textbook.<sup>1</sup>

A Moore graph is a  $d$ -regular graph with diameter  $k$ , where the number of vertices is  $n = 1 + d \sum_{i=0}^{k-1} (d-1)^i$ . The structure of the Moore graph ensures that the union of paths  $P_{i,j}$  that end in  $j$  form a balanced tree rooted in  $j$ . That is, there are  $d(d-1)^{\ell-1}$  vertices at depth  $\ell$  and each of them have  $\frac{n-1-d \sum_{m=0}^{\ell-1} (d-1)^m}{d(d-1)^{\ell-1}}$  descendants. As a consequence, if we consider the shortest paths between a fixed vertex  $j$  and all other vertices then an edge between a vertex at depth  $\ell$  and its parent appears as often as:

$$1 + \frac{n-1-d \sum_{m=0}^{\ell-1} (d-1)^m}{d(d-1)^{\ell-1}} = \frac{n-1-d \sum_{m=0}^{\ell-2} (d-1)^m}{d(d-1)^{\ell-1}}$$

---

<sup>1</sup>Diestel, R. Graph Theory (5th edition). Springer-Verlag, 2017.

With the same assumptions on the errors as before, we compute:

$$\begin{aligned}
\text{Var} [\hat{s}_j] &= \text{Var} \left[ \frac{1}{n} \sum_{i \neq j} \sum_{(u,v) \in E(P_{i,j})} \varepsilon_{u,v} \right] \\
&= \text{Var} \left[ \frac{1}{n} \sum_{\ell=1}^k \sum_{\substack{\text{vertex } i \\ \text{at depth } \ell}} \left( \frac{n-1-d \sum_{m=0}^{\ell-2} (d-1)^m}{d(d-1)^{\ell-1}} \right) \varepsilon_{i,\text{parent}(i)} \right] \\
&= \frac{1}{n^2} \sum_{\ell=1}^k \sum_{\substack{\text{vertex } i \\ \text{at depth } \ell}} \left( \frac{n-1-d \sum_{m=0}^{\ell-2} (d-1)^m}{d(d-1)^{\ell-1}} \right)^2 \text{Var} [\varepsilon_{i,\text{parent}(i)}] \\
&\leq \frac{1}{n^2} \sum_{\ell=1}^k d(d-1)^{\ell-1} \left( \frac{n-1-d \sum_{m=0}^{\ell-2} (d-1)^m}{d(d-1)^{\ell-1}} \right)^2 \varepsilon \\
&= \frac{1}{n^2} \sum_{\ell=1}^k \frac{\left( n-1-d \sum_{m=0}^{\ell-2} (d-1)^m \right)^2}{d(d-1)^{\ell-1}} \varepsilon.
\end{aligned}$$

We continue

$$\text{Var} [\hat{s}_j] \leq \frac{1}{n^2} \sum_{\ell=1}^{\infty} \frac{n^2}{(d-1)^\ell} \varepsilon = \frac{1}{d-2} \varepsilon,$$

where in the last step we have used the identity of a geometric series. Therefore, the variance decreases with  $d$ , and thus, with high probability and increasing  $d$ , the estimate  $\hat{s}_j$  will be close to the true value  $s_j$ .

## B Expected length of a permutation path

We compute the expected length  $\ell$  of a path of a permutation  $\tau$  of the positions. The computation involves three expectations: the expectation  $\mathbb{E}_{s_1, \dots, s_n}$  with respect to the random process to draw the shifts  $s_i$ , the expectation  $\mathbb{E}_{s_{1,2}, \dots, s_{k,k+1}}$  to draw the shifts between consecutive measurements (governed by a 2-dimensional normal distribution with mean 0 and variance  $\sigma^2$  in each direction), and the expectation  $\mathbb{E}_\tau$  with respect to the choice of the random permutation  $\tau$ . We furthermore use  $\mathbb{P}$  to denote a probability.

$$\begin{aligned}
\mathbb{E}_{s_1, \dots, s_n} \mathbb{E}_\tau [\ell] &= \mathbb{E}_{s_1, \dots, s_n} \mathbb{E}_\tau \left[ \sum_{i=1}^{n-1} \|s_{\tau(i+1)} - s_{\tau(i)}\| \right] \\
&= \sum_{i=1}^{n-1} \mathbb{E}_\tau \mathbb{E}_{s_1, \dots, s_n} [\|s_{\tau(i+1)} - s_{\tau(i)}\|] \\
&= \sum_{i=1}^{n-1} \sum_{k=1}^{n-1} \mathbb{P} [|\tau(i+1) - \tau(i)| = k] \mathbb{E}_{s_{1,2}, \dots, s_{k,k+1}} \left[ \left\| \sum_{j=1}^k s_{j,j+1} \right\| \right] \\
&= \sum_{i=1}^{n-1} \left[ \sum_{k=1}^{n-1} \mathbb{P} [|\tau(i+1) - \tau(i)| = k] \sqrt{\frac{\pi}{2}} \sqrt{k\sigma^2} \right],
\end{aligned}$$

where the last step uses that  $\|\sum_{j=1}^k s_{j,j+1}\|$  is distributed according to a Rayleigh distribution<sup>2</sup> with scale parameter  $\sqrt{k\sigma^2}$ . We continue

$$\begin{aligned}\mathbb{E}_{s_1, \dots, s_n} \mathbb{E}_\tau [\ell] &= (n-1) \sqrt{\frac{\pi}{2}} \sigma \sum_{k=1}^{n-1} \frac{(n-k)}{n(n-1)} \sqrt{k} \\ &= \frac{\sqrt{2\pi}\sigma}{2n} \sum_{k=1}^{n-1} (n-k) \sqrt{k} \\ &= \frac{\sqrt{2\pi}\sigma}{2} \left( \sum_{k=1}^{n-1} \sqrt{k} - \frac{1}{n} \sum_{k=1}^{n-1} k^{\frac{3}{2}} \right)\end{aligned}$$

Using the Euler-Maclaurin formula<sup>3</sup> for both sums, this can be written as:

$$\begin{aligned}\mathbb{E}_{s_1, \dots, s_n} \mathbb{E}_\tau [\ell] &= \frac{\sqrt{2\pi}\sigma}{2} \left( \left( \frac{2}{3} n^{\frac{3}{2}} + \frac{1}{2} n^{\frac{1}{2}} + O(1) \right) - \left( \frac{2}{5} n^{\frac{3}{2}} + \frac{1}{2} n^{\frac{1}{2}} + O(1) \right) \right) \\ &= \frac{2\sqrt{2\pi}}{15} \sigma n^{\frac{3}{2}} + \sigma O(1)\end{aligned}$$

(The  $O(1)$ -notation means: a quantity that is bounded as  $n$  grows to infinity.)

---

<sup>2</sup>Papoulis, A. and Pillai, S. U. Probability, random variables, and stochastic processes. Tata McGraw-Hill Education, 2002.

<sup>3</sup>Apostol, T. M. An elementary view of Euler's summation formula. *The American Mathematical Monthly*, 106(5): 409–418, 1999.
